# Supplementary material for: ERK1/2 Signaling Dominates Over RhoA Signaling in Regulating Early Changes in RNA Expression Induced by Endothelin-1 in Neonatal Rat Cardiomyocytes
Source: PubMed Central journal article supplement (PMC2848868; doi:10.1371/journal.pone.0010027), 2010-04-02
Supplement: pone.0010027.s007.pdf [file pone.0010027.s007.pdf]

**Table S7. Primers used for qPCR validation of microarray data.** Nucleotide positions in transcripts are shown in parentheses for each primer. mRNA sequences (accession numbers provided) for established genes were obtained from the Rat Genome Database (<http://rgb.mcw.edu>, viewed at <http://www.ncbi.nlm.nih.gov/entrez>).

| Gene     | Accession no. | Size (bp) | Forward primer                        | Reverse primer                          |
|----------|---------------|-----------|---------------------------------------|-----------------------------------------|
| Abra     | NM_175844     | 90        | CCTTGCACTCCCAGGCAA<br>(691-708)       | ACCTGCCTTCAAGTTGTCCAC<br>(759-780)      |
| Areg     | NM_017123     | 71        | TCGCAGCTATTGGCATCATTA<br>(611-633)    | TTCTGCTTCTTCATATTCCTGAA<br>(658-681)    |
| Bmp2     | NM_017178     | 93        | CATCACGAAGAAGCCATCG<br>(395-413)      | CTCATCAGTAGGGACAGAAC<br>(468-487)       |
| Egr1     | NM_012551     | 117       | CTATGAGCACCTGACCACAGAGTC<br>(561-584) | GCAACCGAGTCGTTTGGCT<br>(659-677)        |
| Egr2     | NM_053633     | 121       | CTGGAGATGGCATGATCAACA<br>(507-527)    | TCTGGTTTCTAGGCGCAGAG<br>(608-627)       |
| Egr3     | NM_017086     | 122       | CAATCTGTACCCCGAGGAGATC<br>(66-87)     | ACATTCTCTGTAGCCATCTGAGTGTA<br>(161-187) |
| Egr4     | NM_019137     | 101       | TCCTGGAGGCGACTTCTTGA<br>(317-336)     | GCCCTCCAGGAAGCAGGA<br>(399-417)         |
| Ereg     | NM_021689     | 82        | CACCGAGAGAAGGATGGAGACT<br>(123-144)   | GGGAACCAAGGCAAAGCA<br>(187-204)         |
| Gapdh    | NM_002046     | 113       | CCAAGGTCATCCATGACAACCTT<br>(552-573)  | AGGGGCCATCCACAGTCTT<br>(626-664)        |
| Hbegf    | NM_012945     | 106       | GGAGAGTGCAGATACCTGAAGGA<br>(384-406)  | GTCAGCCCATGACACCTCTGT<br>(469-489)      |
| IL6      | NM_012589     | 157       | GAGTTGTGCAATGGCAATTC<br>(266-285)     | ACTCCAGAAGACCAGAGCAG<br>(403-422)       |
| Inhba    | NM_017128     | 94        | GAATGAACTCATGGAGCAGACCT<br>(504-529)  | AATGCAGTGTCTTCCTGGCTG<br>(577-597)      |
| Klf4     | NM_053713     | 175       | TCAAGAGCTCATGCCACCGG<br>(1180-1199)   | CTCGCCTGTGTGAGTTCGCA<br>(1335-1354)     |
| Klf6     | NM_031642     | 98        | GCTCCCCTTGAAGCACATC<br>(641-658)      | TTCTTGCAAAACGCCACTCA<br>(729-738)       |
| Klf15    | NM_053536     | 74        | TGCGGCTGGAGGTTTTCA<br>(1347-1354)     | TCACACCCGAGTGAGATCGT<br>(1411-1420)     |
| Slc25a25 | NM_145677     | 80        | GACTGCCCATGCTCAATGAGT<br>(2945-2965)  | TTTCCTCATCAGGCCATTCTG<br>(3004-3024)    |
| Srf      | NM_001109302  | 81        | CATGAAGAAGGCTTATGAGCTGTC<br>(820-843) | TACACATGGCCTGTCTCACTGG<br>(879-900)     |
